# Supplementary material for: miR-128 regulates neuronal migration, outgrowth and intrinsic excitability via the intellectual disability gene Phf6
Source: eLife journal article supplement (doi:10.7554/elife.04263), 2015-01-03

**A**

&gt;mmu-miR-128-1

CGGGGCCGUAGCACUGU**CUGAGAGGUUUACA**UUUCUCACAGUGAACCGGUCUCUUU

&gt;mmu-miR-128-2

GGGGGCCGAUGCACUGUAA**GAGAGUGAGUAGCAGG**UUCACAGUGAACCGGUCUCUUU**B**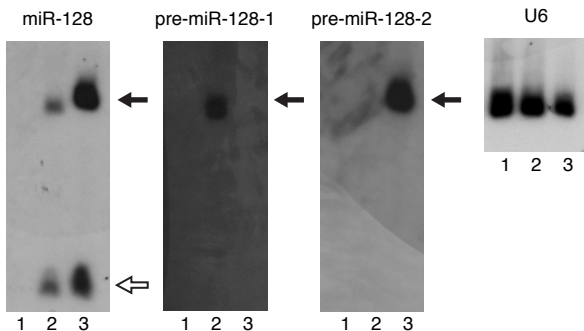**C**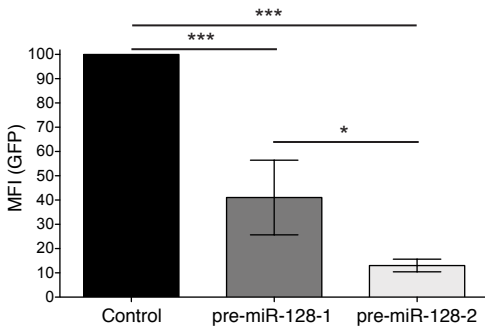

Supplement: supp [file elife_poa_e04263_Figure_1_figure_supplement_1.pdf › elife_poa_e04263_Figure_1_figure_supplement_1.pdf]
