# Supplementary material for: miR-128 regulates neuronal migration, outgrowth and intrinsic excitability via the intellectual disability gene Phf6
Source: eLife journal article supplement (doi:10.7554/elife.04263), 2015-01-03
Supplement: supp [file elife_poa_e04263_Supplementary_File_2.pdf › elife_poa_e04263_Supplementary_File_2.pdf]

| Distance from<br>soma | dsRed- pre- miR-<br>128-2 |         | pre miR-128-2 vs<br>Phf6 |         | dsRed vs<br>Phf6 |         |
|-----------------------|---------------------------|---------|--------------------------|---------|------------------|---------|
|                       | P value                   | Summary | P value                  | Summary | P value          | Summary |
| 15                    | P > 0.05                  | ns      | P > 0.05                 | ns      | P > 0.05         | ns      |
| 20                    | P > 0.05                  | ns      | P > 0.05                 | ns      | P > 0.05         | ns      |
| 25                    | P > 0.05                  | ns      | P > 0.05                 | ns      | P > 0.05         | ns      |
| 30                    | P > 0.05                  | ns      | P > 0.05                 | ns      | P > 0.05         | ns      |
| 35                    | P > 0.05                  | ns      | P > 0.05                 | ns      | P > 0.05         | ns      |
| 40                    | P < 0.001                 | ***     | P < 0.05                 | *       | P > 0.05         | ns      |
| 45                    | P < 0.01                  | **      | P < 0.001                | ***     | P > 0.05         | ns      |
| 50                    | P < 0.001                 | ***     | P > 0.05                 | ns      | P > 0.05         | ns      |
| 55                    | P < 0.001                 | ***     | P > 0.05                 | ns      | P > 0.05         | ns      |
| 60                    | P < 0.001                 | ***     | P < 0.05                 | *       | P > 0.05         | ns      |
| 65                    | P < 0.001                 | ***     | P < 0.001                | ***     | P > 0.05         | ns      |
| 70                    | P < 0.001                 | ***     | P < 0.01                 | **      | P > 0.05         | ns      |
| 75                    | P < 0.001                 | ***     | P < 0.05                 | *       | P > 0.05         | ns      |
| 80                    | P > 0.05                  | ns      | P > 0.05                 | ns      | P > 0.05         | ns      |
| 85                    | P > 0.05                  | ns      | P > 0.05                 | ns      | P > 0.05         | ns      |
| 90                    | P > 0.05                  | ns      | P > 0.05                 | ns      | P > 0.05         | ns      |
| 95                    | P > 0.05                  | ns      | P > 0.05                 | ns      | P > 0.05         | ns      |
| 100                   | P > 0.05                  | ns      | P > 0.05                 | ns      | P > 0.05         | ns      |
| 105                   | P > 0.05                  | ns      | P > 0.05                 | ns      | P > 0.05         | ns      |
| 110                   | P > 0.05                  | ns      | P > 0.05                 | ns      | P > 0.05         | ns      |
| 115                   | P > 0.05                  | ns      | P > 0.05                 | ns      | P > 0.05         | ns      |
| 120                   | P > 0.05                  | ns      | P > 0.05                 | ns      | P > 0.05         | ns      |
| 125                   | P > 0.05                  | ns      | P > 0.05                 | ns      | P > 0.05         | ns      |
| 130                   | P > 0.05                  | ns      | P > 0.05                 | ns      | P > 0.05         | ns      |
| 135                   | P > 0.05                  | ns      | P > 0.05                 | ns      | P > 0.05         | ns      |
| 140                   | P > 0.05                  | ns      | P > 0.05                 | ns      | P > 0.05         | ns      |
| 145                   | P > 0.05                  | ns      | P > 0.05                 | ns      | P > 0.05         | ns      |
| 150                   | P > 0.05                  | ns      | P > 0.05                 | ns      | P > 0.05         | ns      |
| 155                   | P > 0.05                  | ns      | P > 0.05                 | ns      | P > 0.05         | ns      |
| 160                   | P > 0.05                  | ns      | P > 0.05                 | ns      | P > 0.05         | ns      |
| 165                   | P > 0.05                  | ns      | P > 0.05                 | ns      | P > 0.05         | ns      |
| 170                   | P > 0.05                  | ns      | P > 0.05                 | ns      | P > 0.05         | ns      |
| 175                   | P > 0.05                  | ns      | P > 0.05                 | ns      | P > 0.05         | ns      |
| 180                   | P > 0.05                  | ns      | P > 0.05                 | ns      | P > 0.05         | ns      |
| 185                   | P > 0.05                  | ns      | P > 0.05                 | ns      | P > 0.05         | ns      |
| 190                   | P > 0.05                  | ns      | P > 0.05                 | ns      | P > 0.05         | ns      |
| 195                   | P > 0.05                  | ns      | P > 0.05                 | ns      | P > 0.05         | ns      |
| 200                   | P > 0.05                  | ns      | P > 0.05                 | ns      | P > 0.05         | ns      |
| 205                   | P > 0.05                  | ns      | P > 0.05                 | ns      | P > 0.05         | ns      |
| 210                   | P > 0.05                  | ns      | P > 0.05                 | ns      | P > 0.05         | ns      |
| 215                   | P > 0.05                  | ns      | P > 0.05                 | ns      | P > 0.05         | ns      |
| 220                   | P > 0.05                  | ns      | P > 0.05                 | ns      | P > 0.05         | ns      |
| 225                   | P > 0.05                  | ns      | P > 0.05                 | ns      | P > 0.05         | ns      |
| 230                   | P > 0.05                  | ns      | P > 0.05                 | ns      | P > 0.05         | ns      |
| 235                   | P > 0.05                  | ns      | P > 0.05                 | ns      | P > 0.05         | ns      |
| 240                   | P > 0.05                  | ns      | P > 0.05                 | ns      | P > 0.05         | ns      |
| 245                   | P > 0.05                  | ns      | P > 0.05                 | ns      | P > 0.05         | ns      |
| 250                   | P > 0.05                  | ns      | P > 0.05                 | ns      | P > 0.05         | ns      |
| 255                   | P > 0.05                  | ns      | P > 0.05                 | ns      | P > 0.05         | ns      |
| 260                   | P > 0.05                  | ns      | P > 0.05                 | ns      | P > 0.05         | ns      |
| 265                   | P > 0.05                  | ns      | P > 0.05                 | ns      | P > 0.05         | ns      |
| 270                   | P > 0.05                  | ns      | P > 0.05                 | ns      | P > 0.05         | ns      |
| 275                   | P > 0.05                  | ns      | P > 0.05                 | ns      | P > 0.05         | ns      |
| 280                   | P > 0.05                  | ns      | P > 0.05                 | ns      | P > 0.05         | ns      |
| 285                   | P > 0.05                  | ns      | P > 0.05                 | ns      | P > 0.05         | ns      |
| 290                   | P > 0.05                  | ns      | P > 0.05                 | ns      | P > 0.05         | ns      |
| 295                   | P > 0.05                  | ns      | P > 0.05                 | ns      | P > 0.05         | ns      |
| 300                   | P > 0.05                  | ns      | P > 0.05                 | ns      | P > 0.05         | ns      |
| 305                   | P > 0.05                  | ns      | P > 0.05                 | ns      | P > 0.05         | ns      |
| 310                   | P > 0.05                  | ns      | P > 0.05                 | ns      | P > 0.05         | ns      |
| 315                   | P > 0.05                  | ns      | P > 0.05                 | ns      | P > 0.05         | ns      |

Table 1
