# Supplementary material for: miR-128 regulates neuronal migration, outgrowth and intrinsic excitability via the intellectual disability gene Phf6
Source: eLife journal article supplement (doi:10.7554/elife.04263), 2015-01-03
Supplement: supp [file elife_poa_e04263_Supplementary_File_3.pdf › elife_poa_e04263_Supplementary_File_3.pdf]

| Distance from<br>soma | dsred vs pre-miR-128-1 |         | dsred vs pre-miR-128-2 |         | pre-miR-128-1 vs pre-miR-128-2 |         |
|-----------------------|------------------------|---------|------------------------|---------|--------------------------------|---------|
| $\mu\text{m}$         | P value                | Summary | P value                | Summary | P value                        | Summary |
| 15                    | P > 0.05               | ns      | P > 0.05               | ns      | P > 0.05                       | ns      |
| 20                    | P > 0.05               | ns      | P > 0.05               | ns      | P > 0.05                       | ns      |
| 25                    | P > 0.05               | ns      | P > 0.05               | ns      | P > 0.05                       | ns      |
| 30                    | P > 0.05               | ns      | P > 0.05               | ns      | P > 0.05                       | ns      |
| 35                    | P > 0.05               | ns      | P<0.01                 | **      | P<0.01                         | **      |
| 40                    | P > 0.05               | ns      | P<0.001                | ***     | P<0.001                        | ***     |
| 45                    | P > 0.05               | ns      | P<0.001                | ***     | P<0.01                         | ***     |
| 50                    | P > 0.05               | ns      | P<0.001                | ***     | P<0.001                        | ***     |
| 55                    | P > 0.05               | ns      | P<0.001                | ***     | P<0.01                         | **      |
| 60                    | P > 0.05               | ns      | P<0.001                | ***     | P<0.01                         | **      |
| 65                    | P > 0.05               | ns      | P<0.001                | ***     | P<0.001                        | ***     |
| 70                    | P > 0.05               | ns      | P<0.001                | ***     | P<0.001                        | ***     |
| 75                    | P > 0.05               | ns      | P<0.001                | ***     | P<0.001                        | ***     |
| 80                    | P > 0.05               | ns      | P<0.001                | ***     | P<0.001                        | ***     |
| 85                    | P > 0.05               | ns      | P<0.001                | ***     | P<0.001                        | ***     |
| 90                    | P < 0.05               | *       | P<0.001                | ***     | P<0.01                         | **      |
| 95                    | P > 0.05               | ns      | P<0.001                | ***     | P < 0.05                       | *       |
| 100                   | P > 0.05               | ns      | P<0.001                | ***     | P<0.01                         | **      |
| 105                   | P > 0.05               | ns      | P<0.001                | ***     | P<0.01                         | **      |
| 110                   | P > 0.05               | ns      | P<0.001                | ***     | P < 0.05                       | *       |
| 115                   | P > 0.05               | ns      | P<0.01                 | **      | P > 0.05                       | ns      |
| 120                   | P > 0.05               | ns      | P<0.01                 | **      | P > 0.05                       | ns      |
| 125                   | P > 0.05               | ns      | P > 0.05               | ns      | P > 0.05                       | ns      |
| 130                   | P > 0.05               | ns      | P > 0.05               | ns      | P > 0.05                       | ns      |
| 135                   | P > 0.05               | ns      | P > 0.05               | ns      | P > 0.05                       | ns      |
| 140                   | P > 0.05               | ns      | P > 0.05               | ns      | P > 0.05                       | ns      |
| 145                   | P > 0.05               | ns      | P > 0.05               | ns      | P > 0.05                       | ns      |
| 150                   | P > 0.05               | ns      | P > 0.05               | ns      | P > 0.05                       | ns      |
| 155                   | P > 0.05               | ns      | P > 0.05               | ns      | P > 0.05                       | ns      |
| 160                   | P > 0.05               | ns      | P > 0.05               | ns      | P > 0.05                       | ns      |
| 165                   | P > 0.05               | ns      | P > 0.05               | ns      | P > 0.05                       | ns      |
| 170                   | P > 0.05               | ns      | P > 0.05               | ns      | P > 0.05                       | ns      |
| 175                   | P > 0.05               | ns      | P > 0.05               | ns      | P > 0.05                       | ns      |
| 180                   | P > 0.05               | ns      | P > 0.05               | ns      | P > 0.05                       | ns      |
| 185                   | P > 0.05               | ns      | P > 0.05               | ns      | P > 0.05                       | ns      |
| 190                   | P > 0.05               | ns      | P > 0.05               | ns      | P > 0.05                       | ns      |
| 195                   | P > 0.05               | ns      | P > 0.05               | ns      | P > 0.05                       | ns      |
| 200                   | P > 0.05               | ns      | P > 0.05               | ns      | P > 0.05                       | ns      |
| 205                   | P > 0.05               | ns      | P > 0.05               | ns      | P > 0.05                       | ns      |
| 210                   | P > 0.05               | ns      | P > 0.05               | ns      | P > 0.05                       | ns      |
| 215                   | P > 0.05               | ns      | P > 0.05               | ns      | P > 0.05                       | ns      |
| 220                   | P > 0.05               | ns      | P > 0.05               | ns      | P > 0.05                       | ns      |
| 225                   | P > 0.05               | ns      | P > 0.05               | ns      | P > 0.05                       | ns      |
| 230                   | P > 0.05               | ns      | P > 0.05               | ns      | P > 0.05                       | ns      |
| 235                   | P > 0.05               | ns      | P > 0.05               | ns      | P > 0.05                       | ns      |
| 240                   | P > 0.05               | ns      | P > 0.05               | ns      | P > 0.05                       | ns      |
| 245                   | P > 0.05               | ns      | P > 0.05               | ns      | P > 0.05                       | ns      |
| 250                   | P > 0.05               | ns      | P > 0.05               | ns      | P > 0.05                       | ns      |
| 255                   | P > 0.05               | ns      | P > 0.05               | ns      | P > 0.05                       | ns      |
| 260                   | P > 0.05               | ns      | P > 0.05               | ns      | P > 0.05                       | ns      |
| 265                   | P > 0.05               | ns      | P > 0.05               | ns      | P > 0.05                       | ns      |
| 270                   | P > 0.05               | ns      | P > 0.05               | ns      | P > 0.05                       | ns      |
| 275                   | P > 0.05               | ns      | P > 0.05               | ns      | P > 0.05                       | ns      |
| 280                   | P > 0.05               | ns      | P > 0.05               | ns      | P > 0.05                       | ns      |
| 285                   | P > 0.05               | ns      | P > 0.05               | ns      | P > 0.05                       | ns      |
| 290                   | P > 0.05               | ns      | P > 0.05               | ns      | P > 0.05                       | ns      |
| 295                   | P > 0.05               | ns      | P > 0.05               | ns      | P > 0.05                       | ns      |
| 300                   | P > 0.05               | ns      | P > 0.05               | ns      | P > 0.05                       | ns      |
| 305                   | P > 0.05               | ns      | P > 0.05               | ns      | P > 0.05                       | ns      |
| 310                   | P > 0.05               | ns      | P > 0.05               | ns      | P > 0.05                       | ns      |
| 315                   | P > 0.05               | ns      | P > 0.05               | ns      | P > 0.05                       | ns      |
| 320                   | P > 0.05               | ns      | P > 0.05               | ns      | P > 0.05                       | ns      |
| 325                   | P > 0.05               | ns      | P > 0.05               | ns      | P > 0.05                       | ns      |
| 330                   | P > 0.05               | ns      | P > 0.05               | ns      | P > 0.05                       | ns      |
| 335                   | P > 0.05               | ns      | P > 0.05               | ns      | P > 0.05                       | ns      |
| 340                   | P > 0.05               | ns      | P > 0.05               | ns      | P > 0.05                       | ns      |
| 345                   | P > 0.05               | ns      | P > 0.05               | ns      | P > 0.05                       | ns      |
| 350                   | P > 0.05               | ns      | P > 0.05               | ns      | P > 0.05                       | ns      |
| 355                   | P > 0.05               | ns      | P > 0.05               | ns      | P > 0.05                       | ns      |
| 360                   | P > 0.05               | ns      | P > 0.05               | ns      | P > 0.05                       | ns      |
| 365                   | P > 0.05               | ns      | P > 0.05               | ns      | P > 0.05                       | ns      |

Table 2
