# Supplementary figures and images for: miR-128 regulates neuronal migration, outgrowth and intrinsic excitability via the intellectual disability gene Phf6
Source: eLife journal article supplement (doi:10.7554/elife.04263), 2015-01-03

# **A** pre-miR-128-1

E12.5 E14.5 E16.5 E18.5 P3 Adult

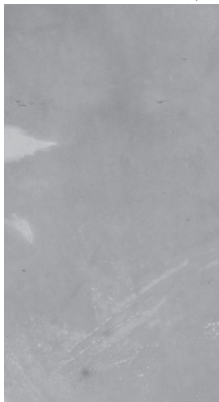

# pre-miR-128-1

**B**

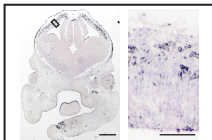

E 12.5

**B'**

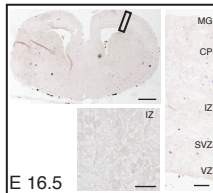

E 16.5

**B''**

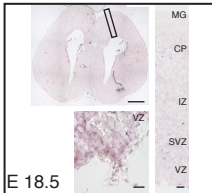

E 18.5

**B'''**

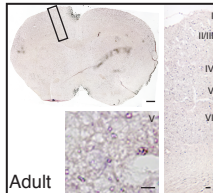

Adult

Supplement: supp [file elife_poa_e04263_Figure_1_figure_supplement_2.pdf › elife_poa_e04263_Figure_1_figure_supplement_2.pdf]

**A**

E 18.5

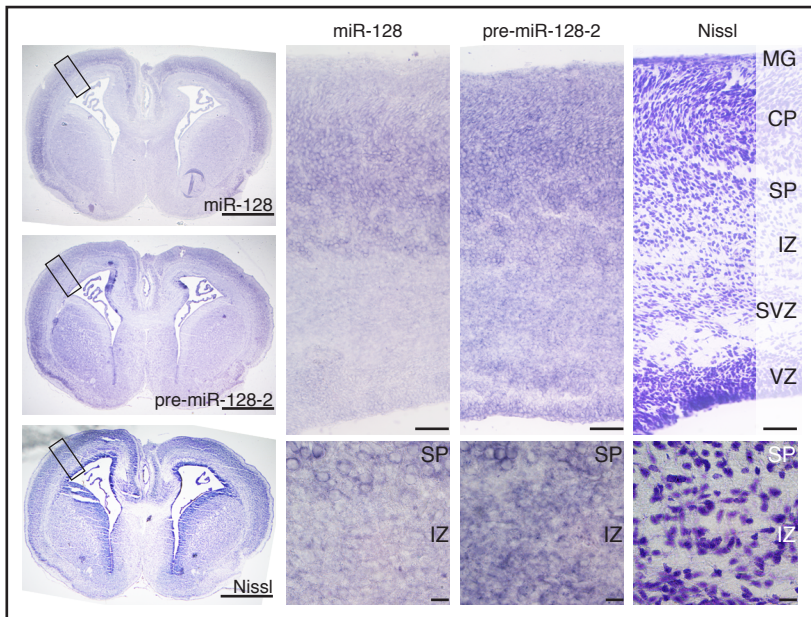**B**

Adult Brain

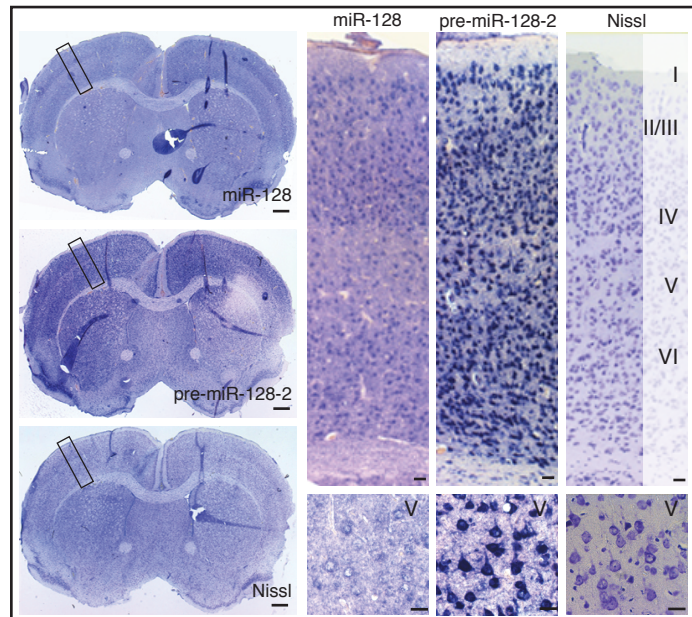

Supplement: supp [file elife_poa_e04263_Figure_2_figure_supplement_1.pdf › elife_poa_e04263_Figure_2_figure_supplement_1.pdf]

E 16.5

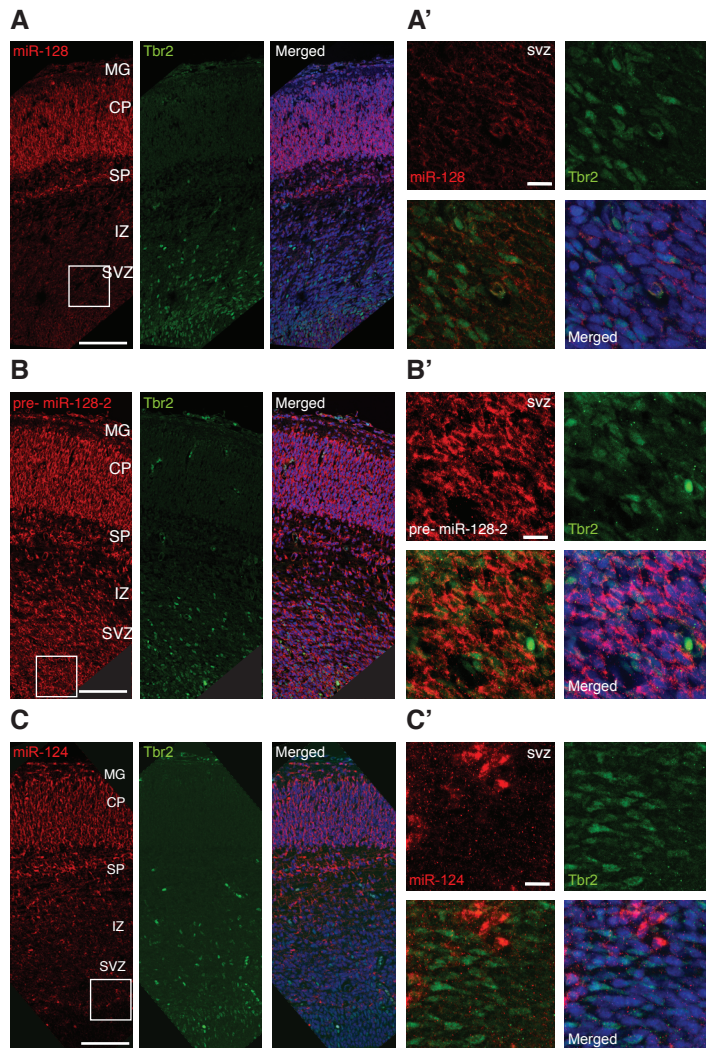

ADULT BRAIN

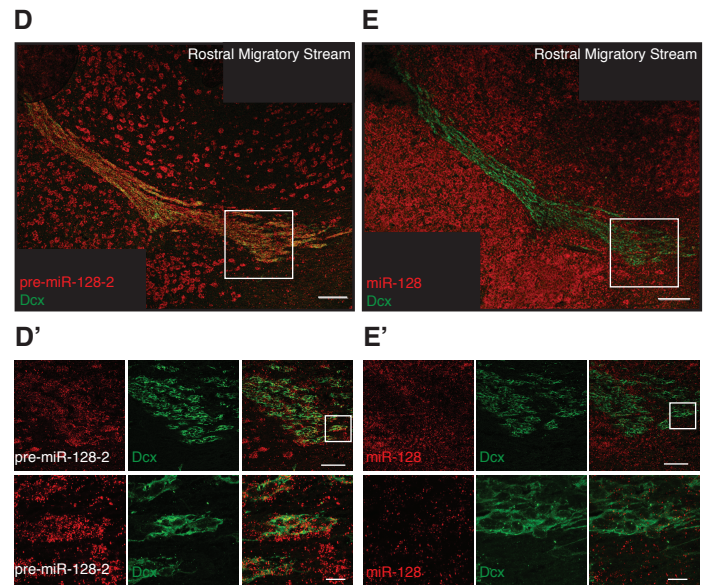

Supplement: supp [file elife_poa_e04263_Figure_2_figure_supplement_2.pdf › elife_poa_e04263_Figure_2_figure_supplement_2.pdf]

**A****E 14.5**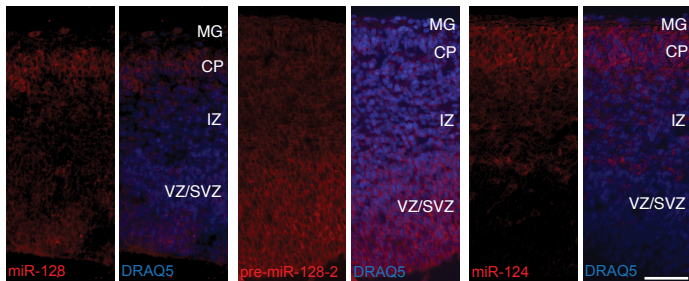**B****E 16.5**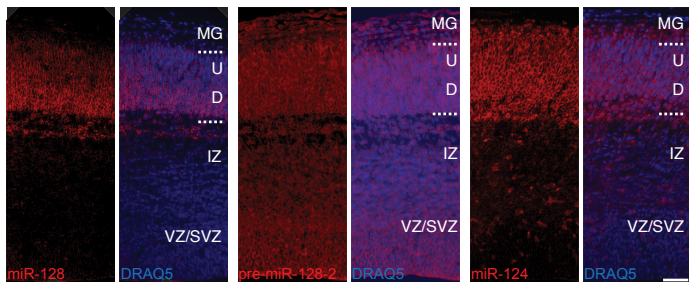

Supplement: supp [file elife_poa_e04263_Figure_2_figure_supplement_3.pdf › elife_poa_e04263_Figure_2_figure_supplement_3.pdf]

**A**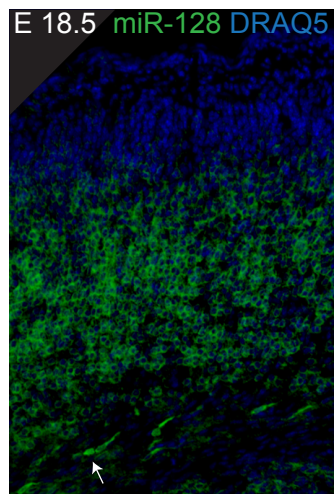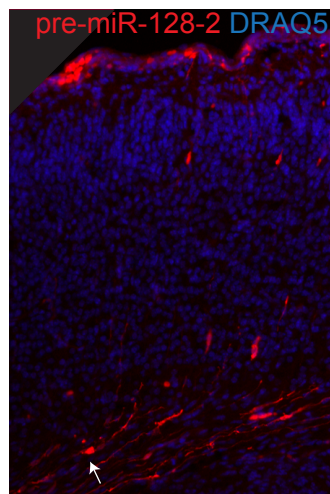**B**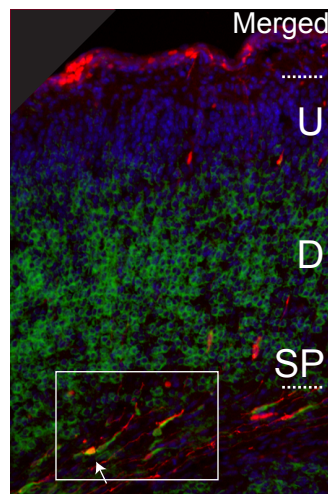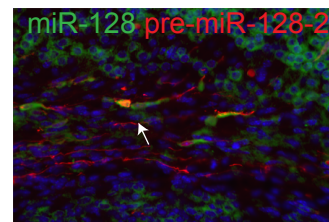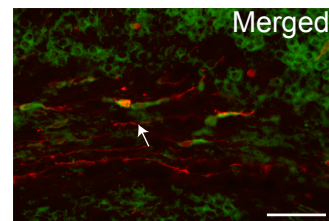**C**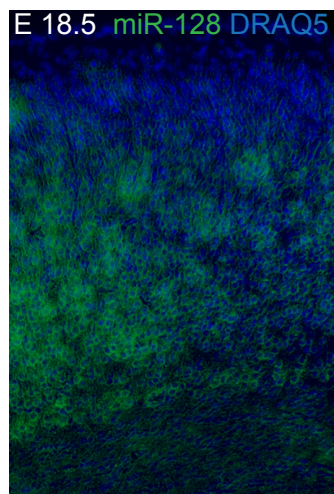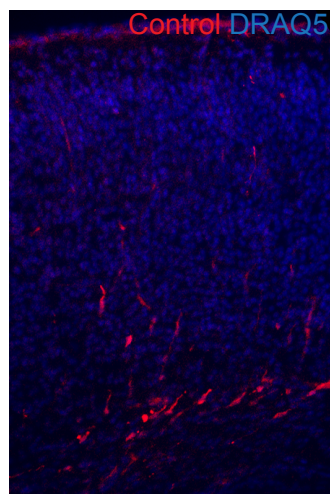**D**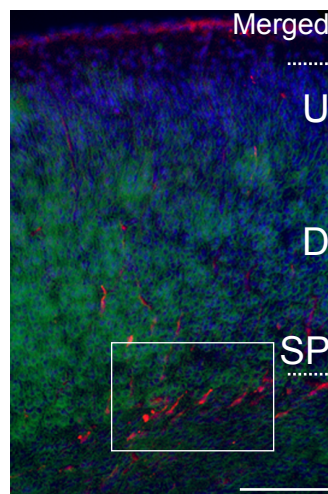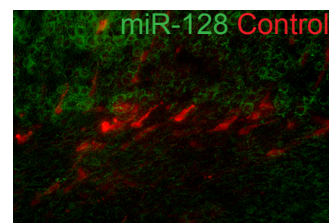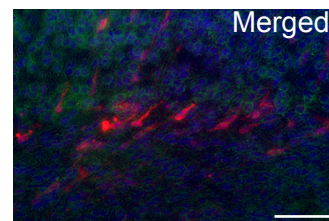

Supplement: supp [file elife_poa_e04263_Figure_3_figure_supplement_1.pdf › elife_poa_e04263_Figure_3_figure_supplement_1.pdf]

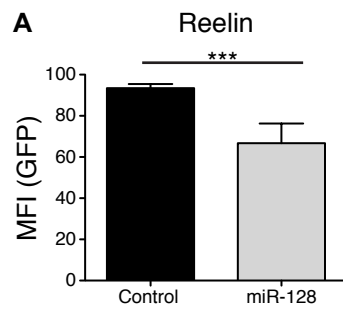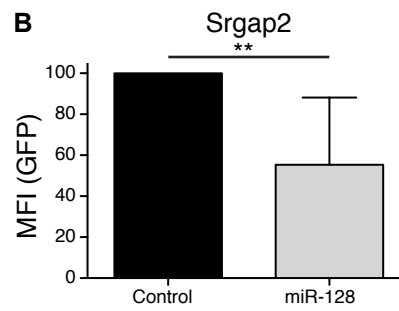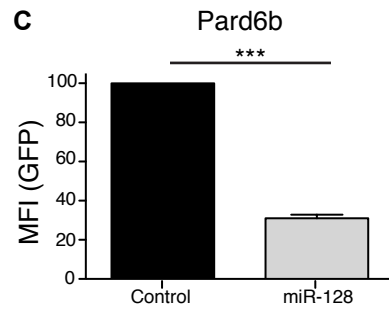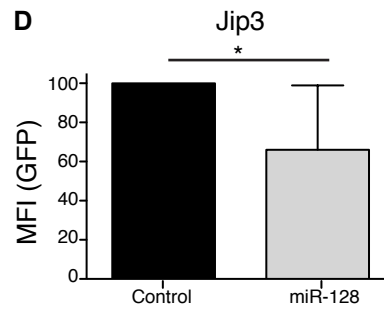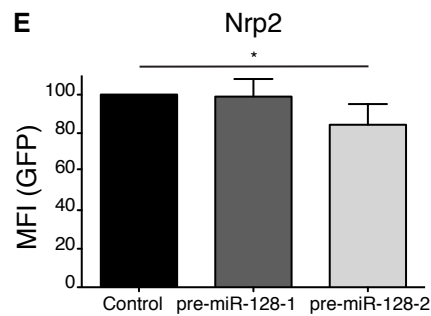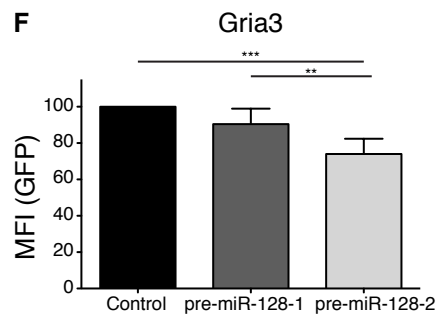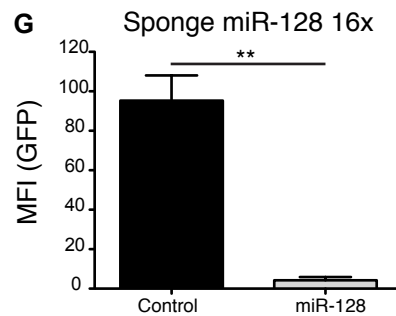

Supplement: supp [file elife_poa_e04263_Figure_5_figure_supplement_1.pdf › elife_poa_e04263_Figure_5_figure_supplement_1.pdf]

7 mer 1300-1328

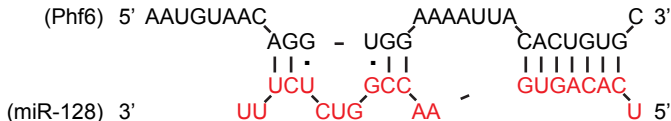

8 mer 1650-1678

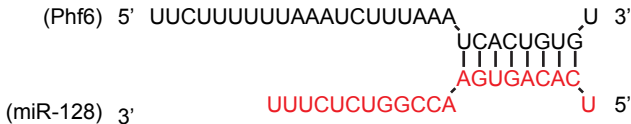

8 mer 1957-1985

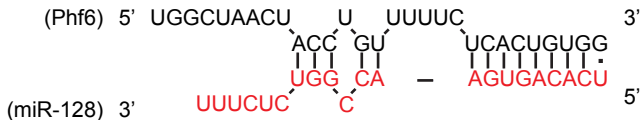

Supplement: supp [file elife_poa_e04263_Figure_5_figure_supplement_2.pdf › elife_poa_e04263_Figure_5_figure_supplement_2.pdf]

**A** HEK-293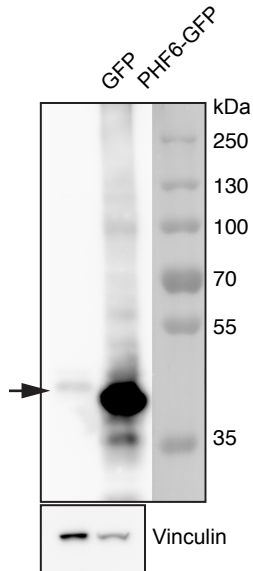**B** Primary Cortical Neurons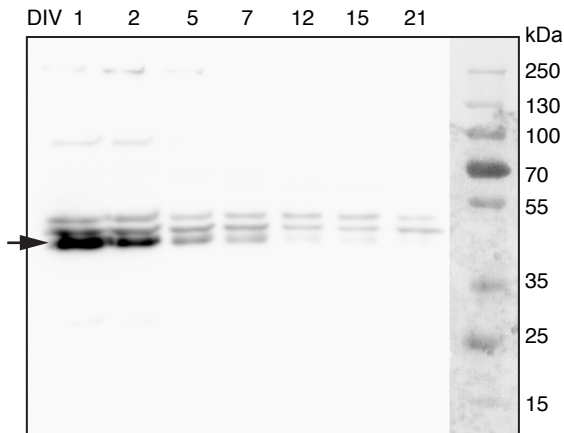

Supplement: supp [file elife_poa_e04263_Figure_5_figure_supplement_3.pdf › elife_poa_e04263_Figure_5_figure_supplement_3.pdf]

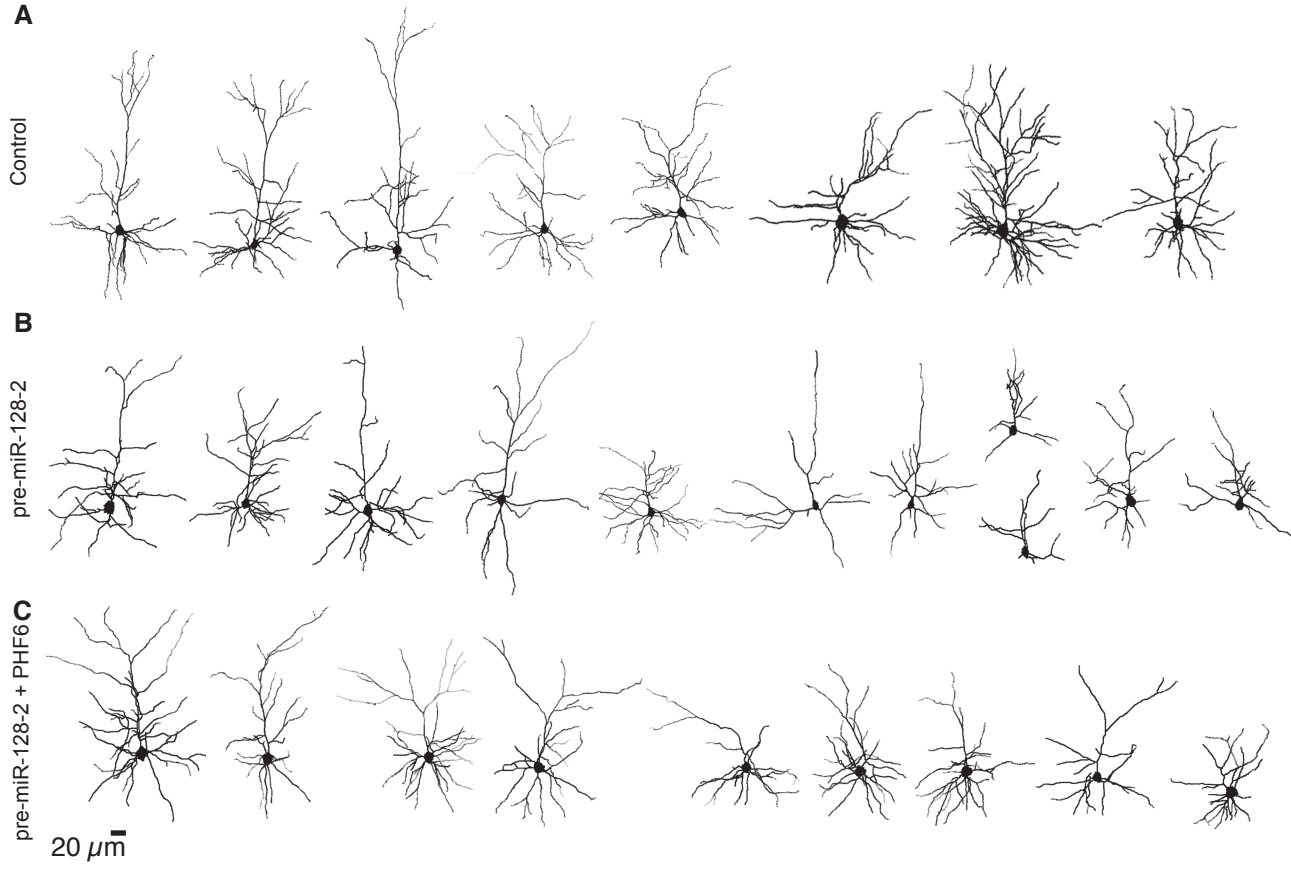

Supplement: supp [file elife_poa_e04263_Figure_7_figure_supplement_1.pdf › elife_poa_e04263_Figure_7_figure_supplement_1.pdf]
